# Supplementary material
Source: publisher figshare collection journal article supplement (https://acs.figshare.com/ndownloader/files/13770740)
Supplement: Supplementary file 1 [file 13770740]

# Catalyst-Assisted Solution-Liquid-Solid Synthesis of CdS/CuInSe<sub>2</sub> and CuInTe<sub>2</sub>/CuInSe<sub>2</sub> Nanorod Heterostructures

Guanwei Jia<sup>†,‡</sup>, Jiang Du<sup>\*,†,§</sup>

<sup>†</sup>Henan Province Industrial Technology Research Institute of Resources and Materials, Zhengzhou University, Zhengzhou 450001, People's Republic of China

<sup>‡</sup>School of Physics and Electronics, Henan University, Kaifeng 475004, People's Republic of China

<sup>§</sup>Department of Chemical Engineering, Texas Materials Institute, Center for Nano- and Molecular Science and Technology, The University of Texas at Austin, Austin, Texas 78712, United States

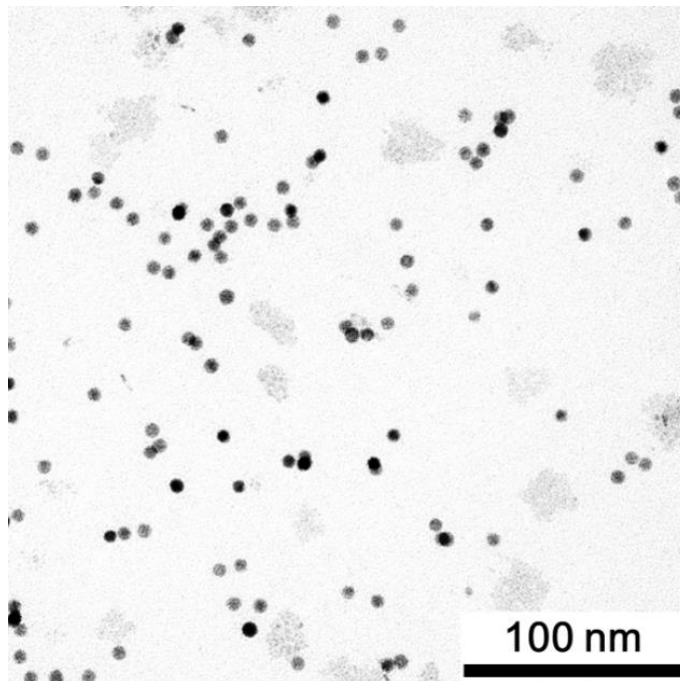

**Figure S1.** TEM image of Bi nanocrystals

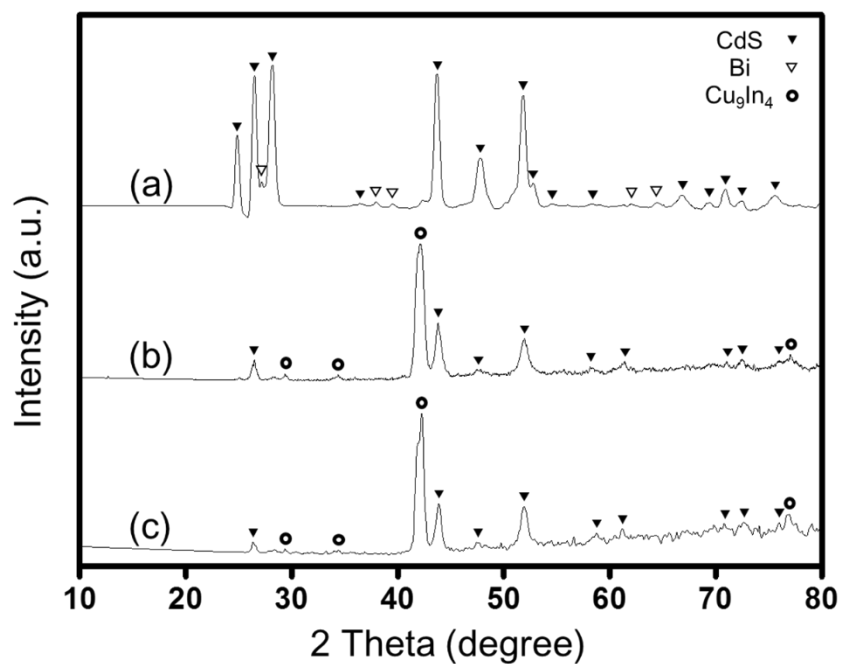

**Figure S2.** XRD pattern of (a) Bi-CdS NWs, and the products obtained by using Bi-CdS NWs as seeds to induce the subsequent heterostructures growth, (b) 0.25 mL Cu, In, and Se precursor solution, (c) 0.5 mL Cu, In, and Se precursor solution.

**Table S1.** EDS data collected from red dots ① to ⑤ (Figure 6 (b), 6 (d) and 6 (f)).

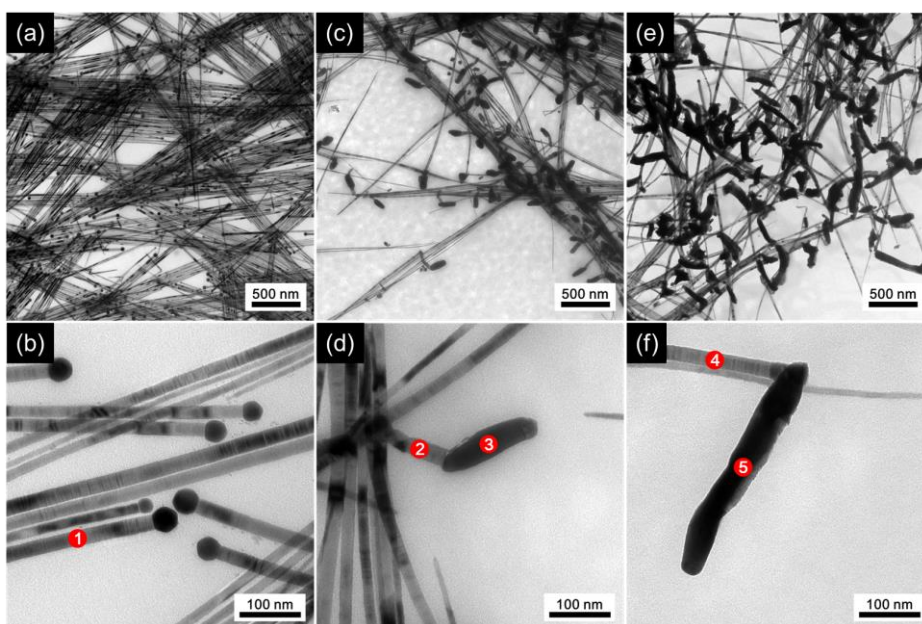

| <b>Point</b> | <b>Bi (At %)</b> | <b>Cu (At %)</b> | <b>In (At %)</b> | <b>Se (At %)</b> | <b>Cd (At %)</b> | <b>S (At %)</b> |
|--------------|------------------|------------------|------------------|------------------|------------------|-----------------|
| <b>1</b>     | 0                | 0                | 0                | 0                | 51.2             | 48.8            |
| <b>2</b>     | 0                | 0                | 37.6             | 3.1              | 27.7             | 31.6            |
| <b>3</b>     | 0.8              | 59.4             | 31.5             | 2.4              | 3.9              | 2.0             |
| <b>4</b>     | 0                | 0.2              | 15.1             | 6.2              | 39.5             | 39.0            |
| <b>5</b>     | 0.6              | 63.0             | 35.9             | 0                | 0.2              | 0.3             |
